# Supplementary figures and images for: Rule-Based Cohort Definitions for Acute Respiratory Distress Syndrome: A Computable Phenotyping Strategy Based on the Berlin Definition
Source: PubMed Central journal article supplement — Crit Care Explor. 2021 Jun 11;3(6):e0451. doi: 10.1097/CCE.0000000000000451 (PMC8202583; doi:10.1097/cce.0000000000000451), 2021-06-11

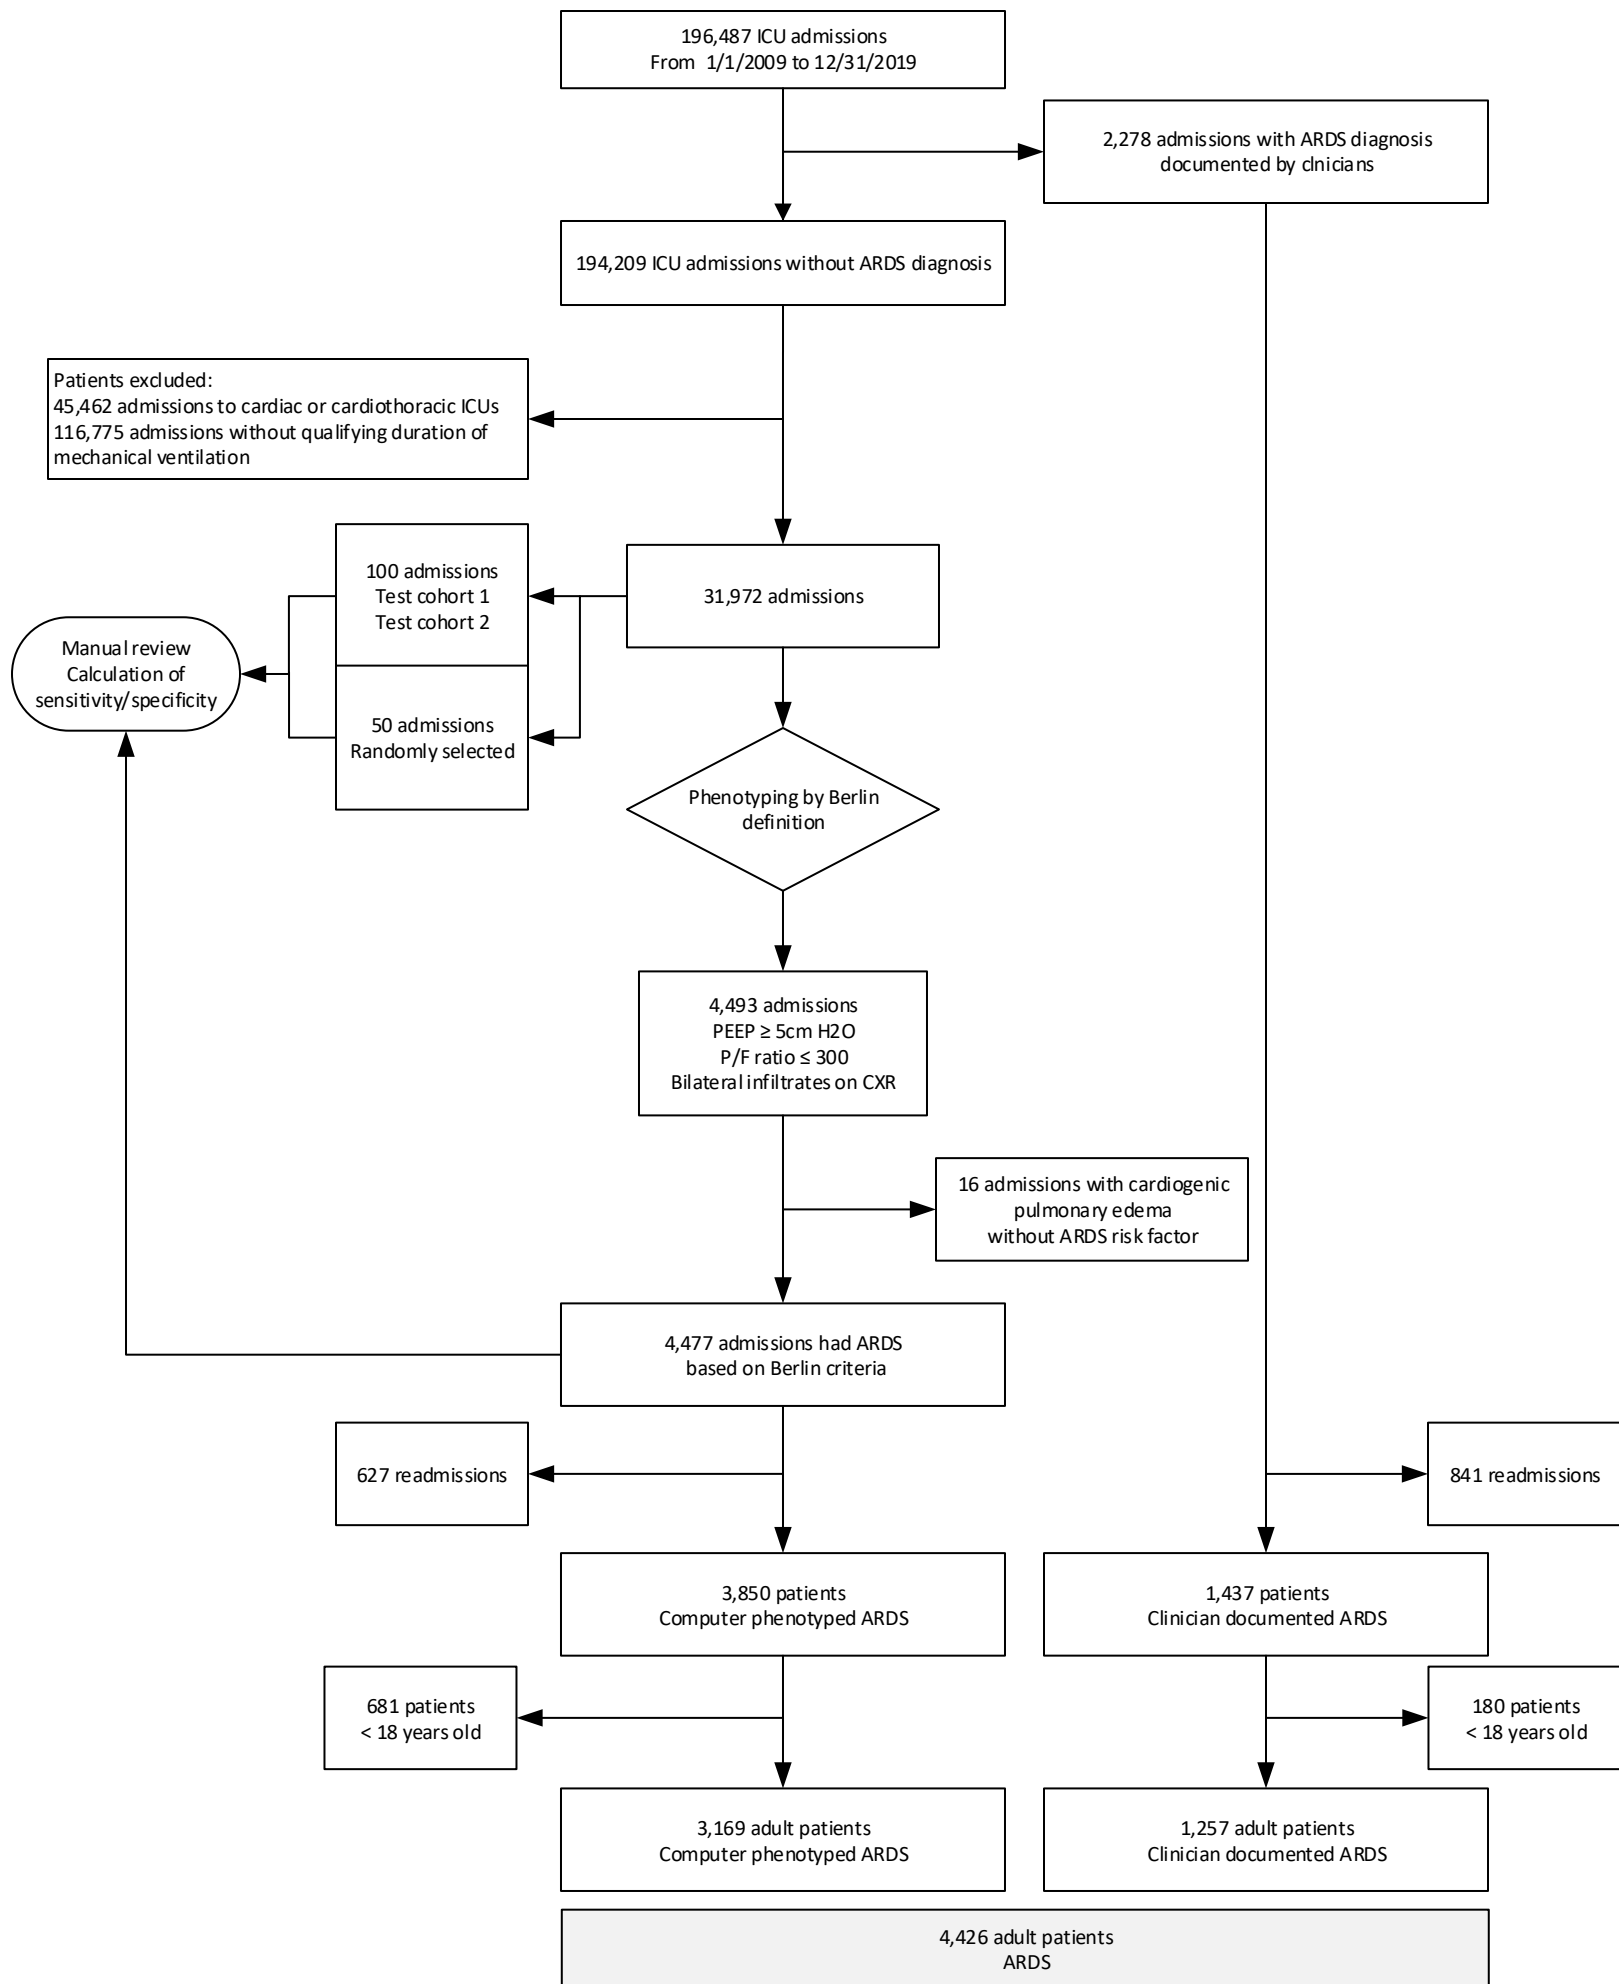

Supplement: cc9-3-e0451-s001.pdf [file cc9-3-e0451-s001.pdf]
